# Supplementary material for: Ion imprinted dual reference ratiometric fluorescence probe for respective and simultaneous detection of Fe3+ and Cu2+
Source: Royal Society of Chemistry journal article supplement (doi:10.1039/c9nj01356c), 2019-01-01
Supplement: c9nj01356c1.pdf [file c9nj01356c1.pdf]

## Supporting Information

### **Ion imprinted dual reference ratiometric fluorescence probe for respective and simultaneous detection of Fe<sup>3+</sup> and Cu<sup>2+</sup>**

Rongjian Ying<sup>a</sup>, Hongzhi Lu<sup>a\*</sup>, Shoufang Xu<sup>b\*</sup>

<sup>a</sup>School of Chemistry and Chemical Engineering, Linyi University, Linyi 276005,

China

<sup>b</sup>School of Materials Science and Engineering, Linyi University, Linyi 276005,

China

\* Corresponding author, E-mail: [luhongzhi@lyu.edu.cn](mailto:luhongzhi@lyu.edu.cn); [shfxu1981@163.com](mailto:shfxu1981@163.com)

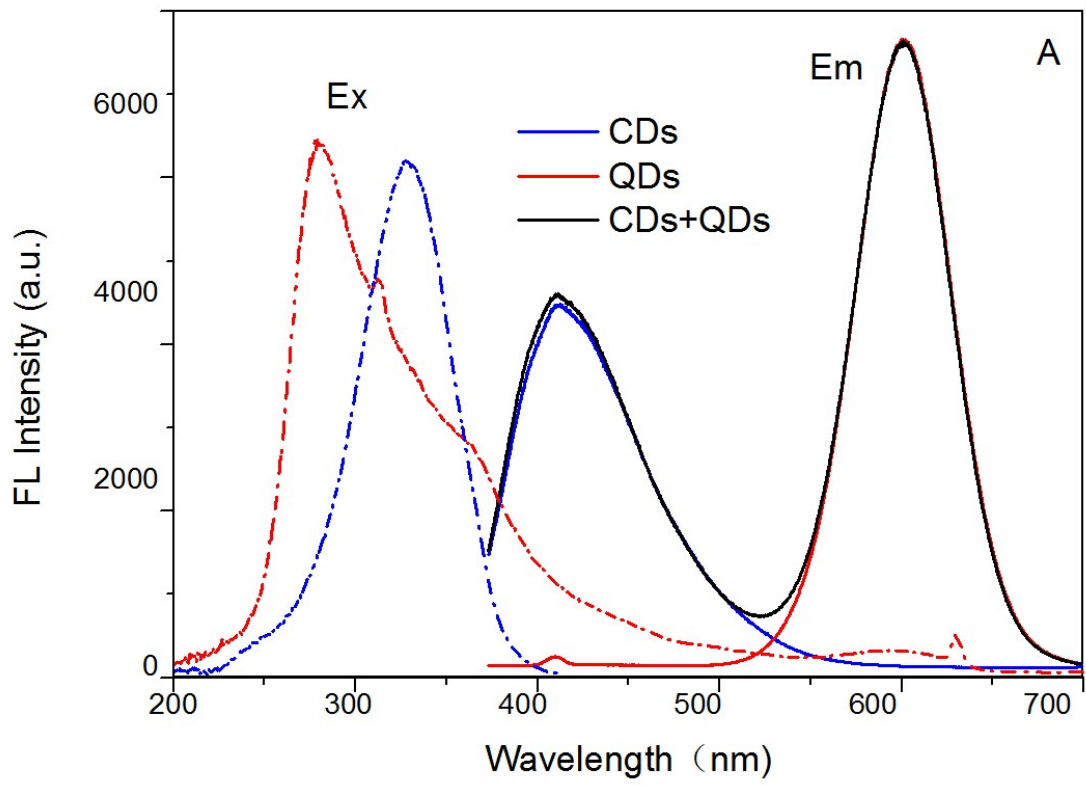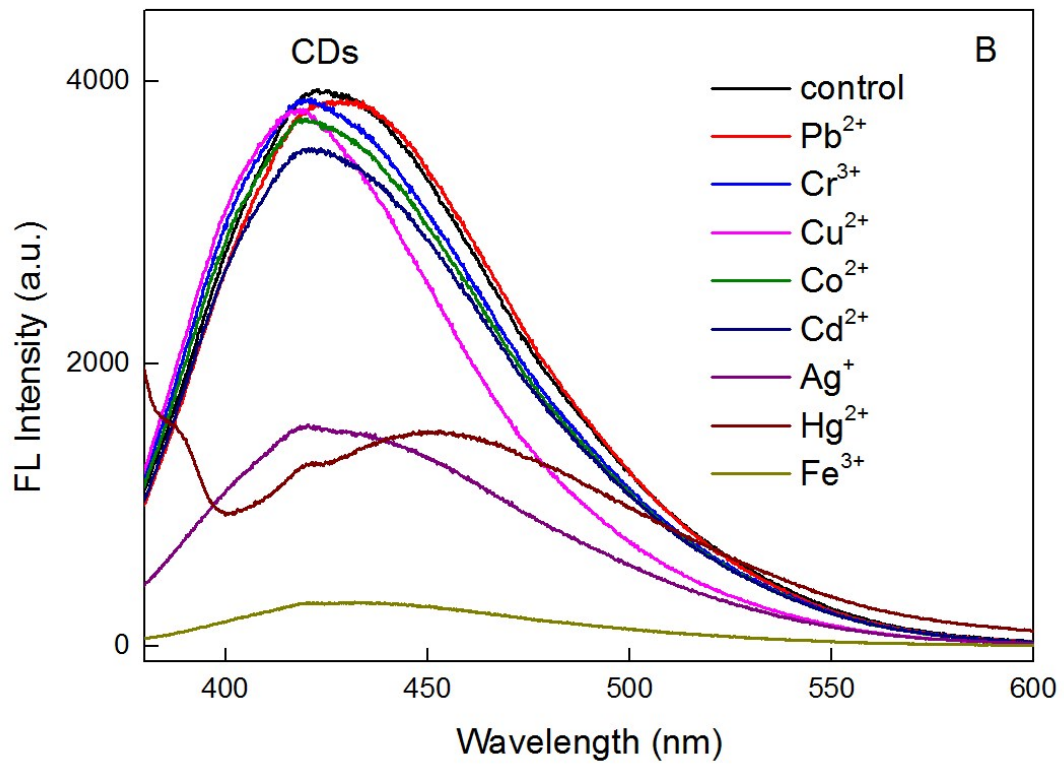

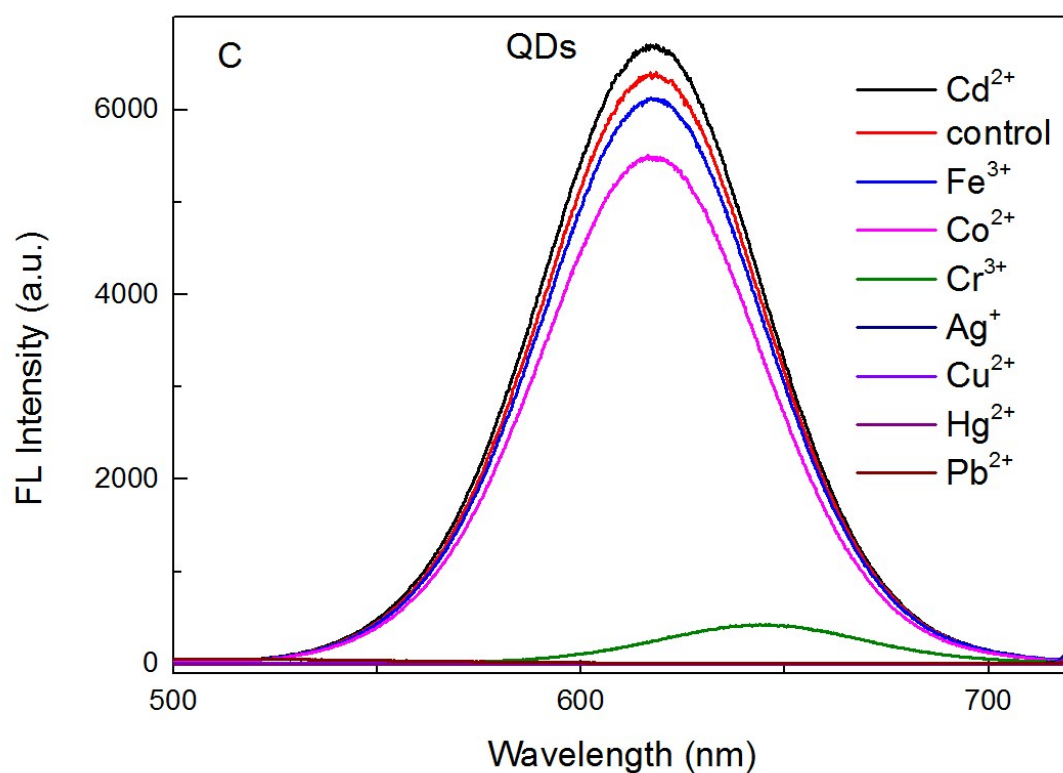

Figure S1 The fluorescence spectrum of CDs, QDs and the mixture of CDs and QDs (A); The fluorescence spectrum of CDs (B) and QDs (C) to various metal ions. The concentration of ions was 10  $\mu$ M, respectively.

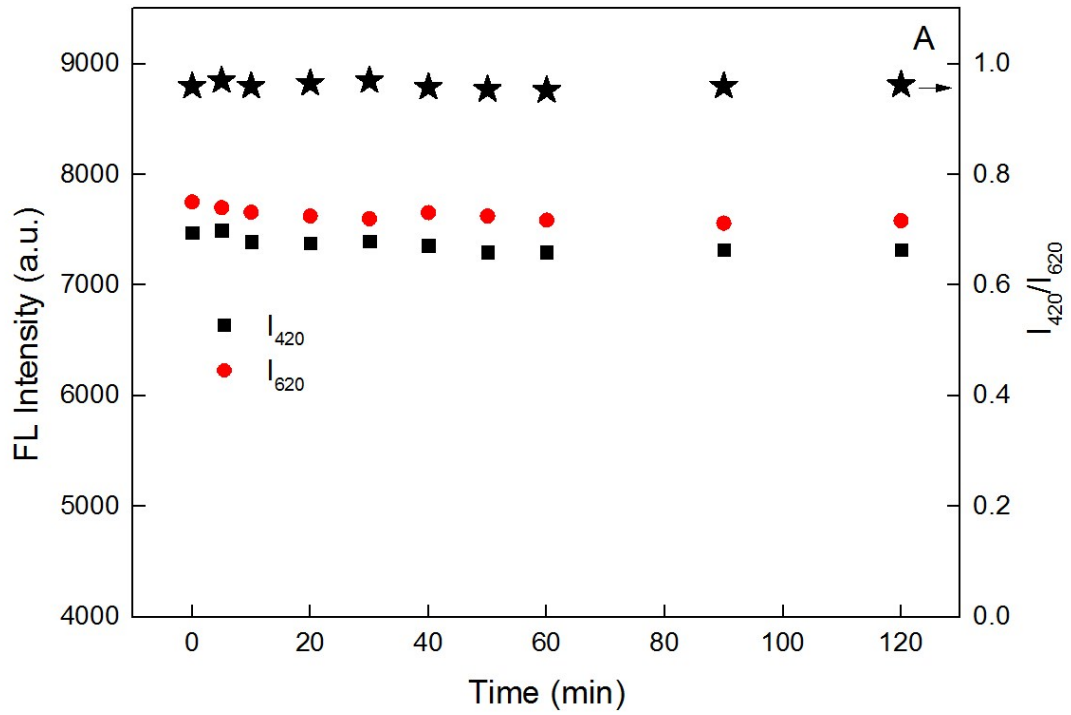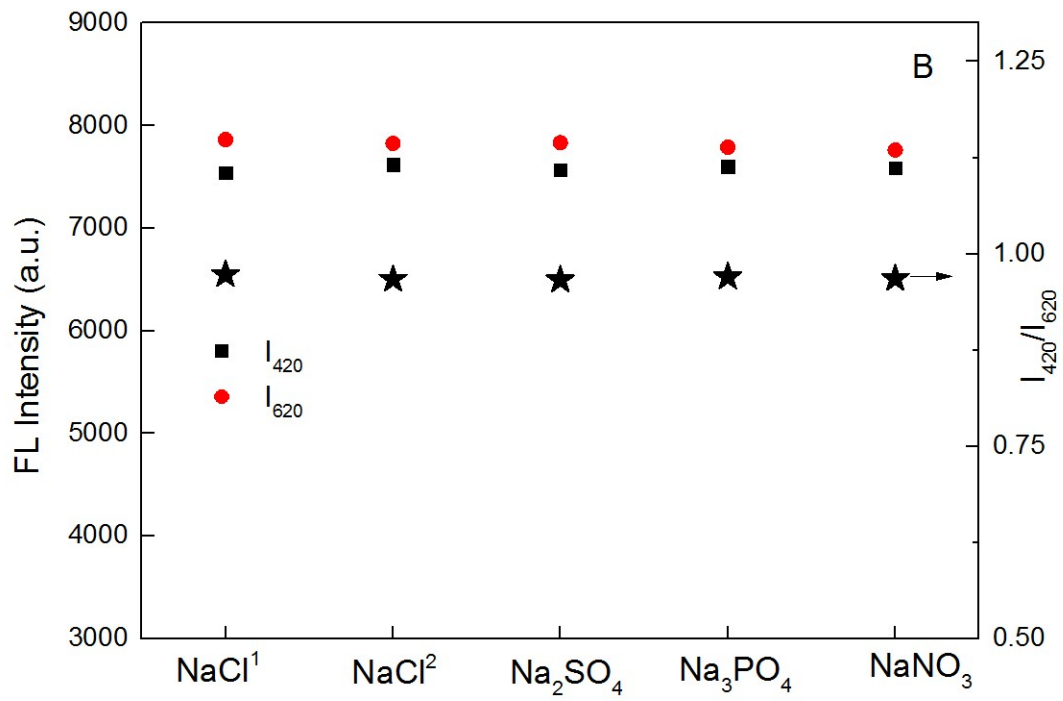

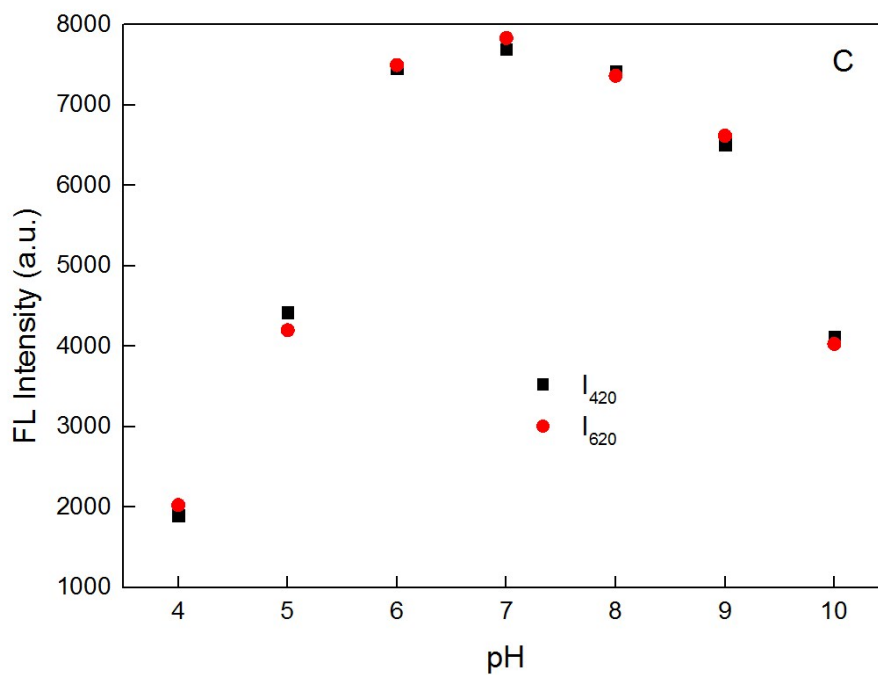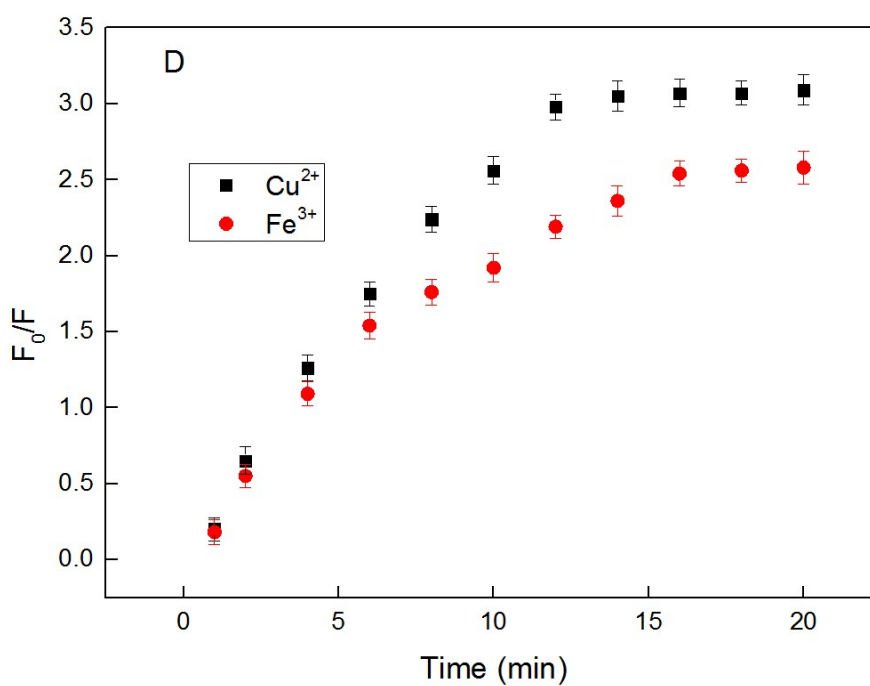

**Figure S2** The stability of the as prepared imprinted probe against UV light (A), various anions (B), and pH (C); and (D) was the fluorescent quenching effect IIPs during 20 min; the concentration of  $\text{Cu}^{2+}$  and  $\text{Fe}^{3+}$  ions was both  $50 \mu\text{M}$ . For  $\text{Cu}^{2+}$ , fluorescent intensity was recorded at 620 nm, For  $\text{Fe}^{3+}$ , fluorescent intensity was recorded at 420 nm.

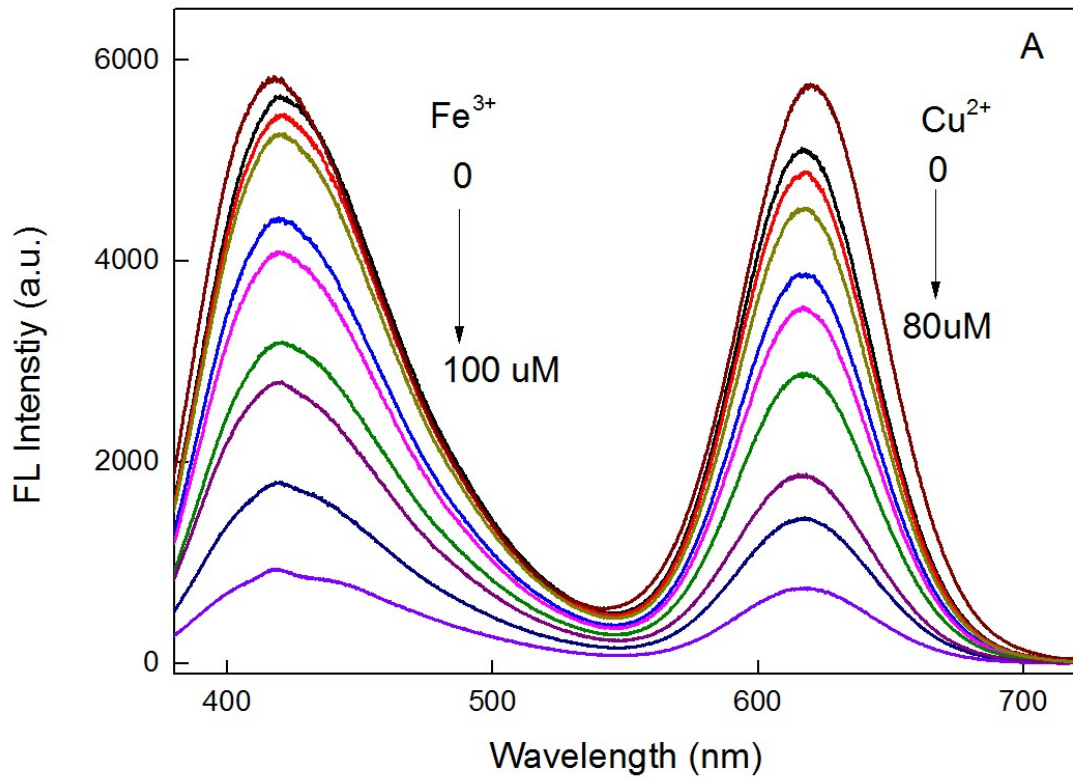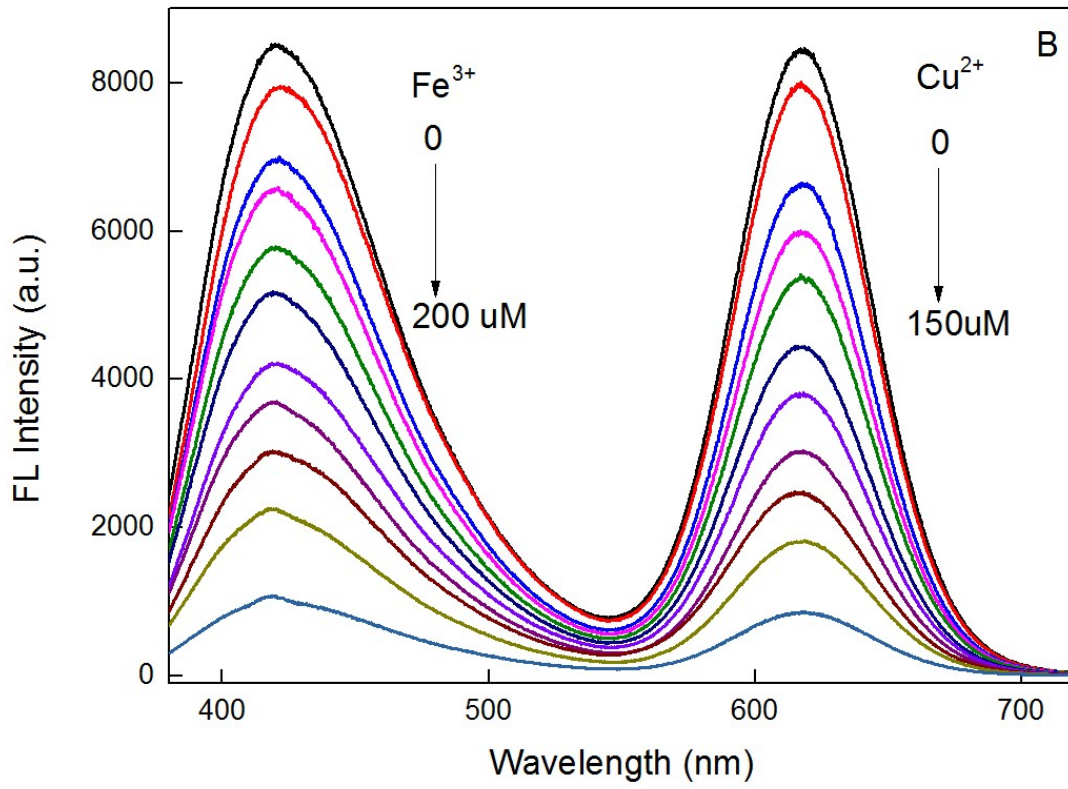

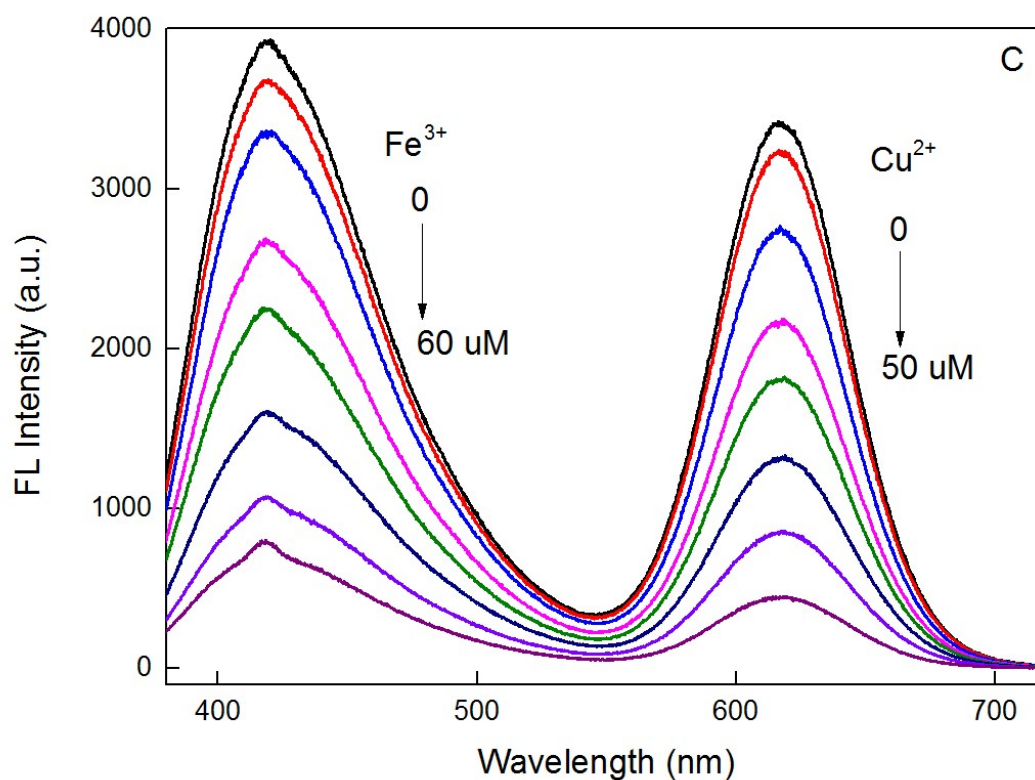

**Figure S3** Different amount of imprinted polymers (A: 100 mg/L; B: 150 mg/L; C: 50 mg/L) exposure to different concentrations of  $\text{Cu}^{2+}$  and  $\text{Fe}^{3+}$ . The experimental conditions were pH=7.0 under room temperature; excited wavelength at 345 nm and the slit widths of emission and excitation were 5 nm ( $n = 5$ ); reaction time was 20 min.

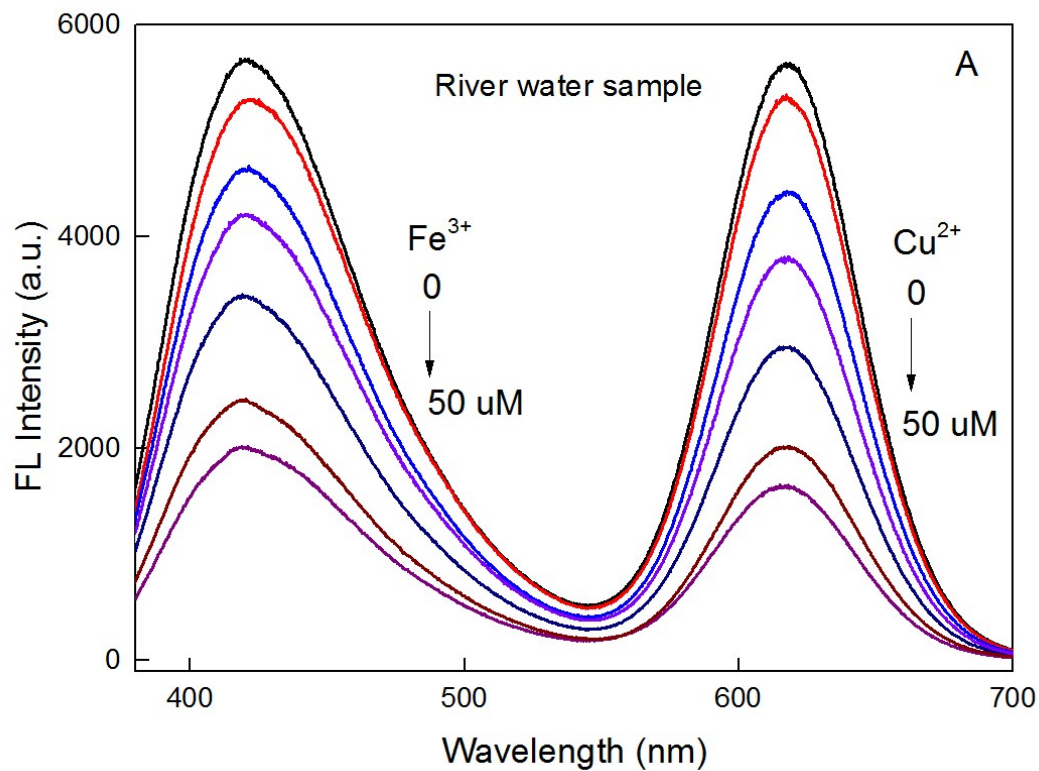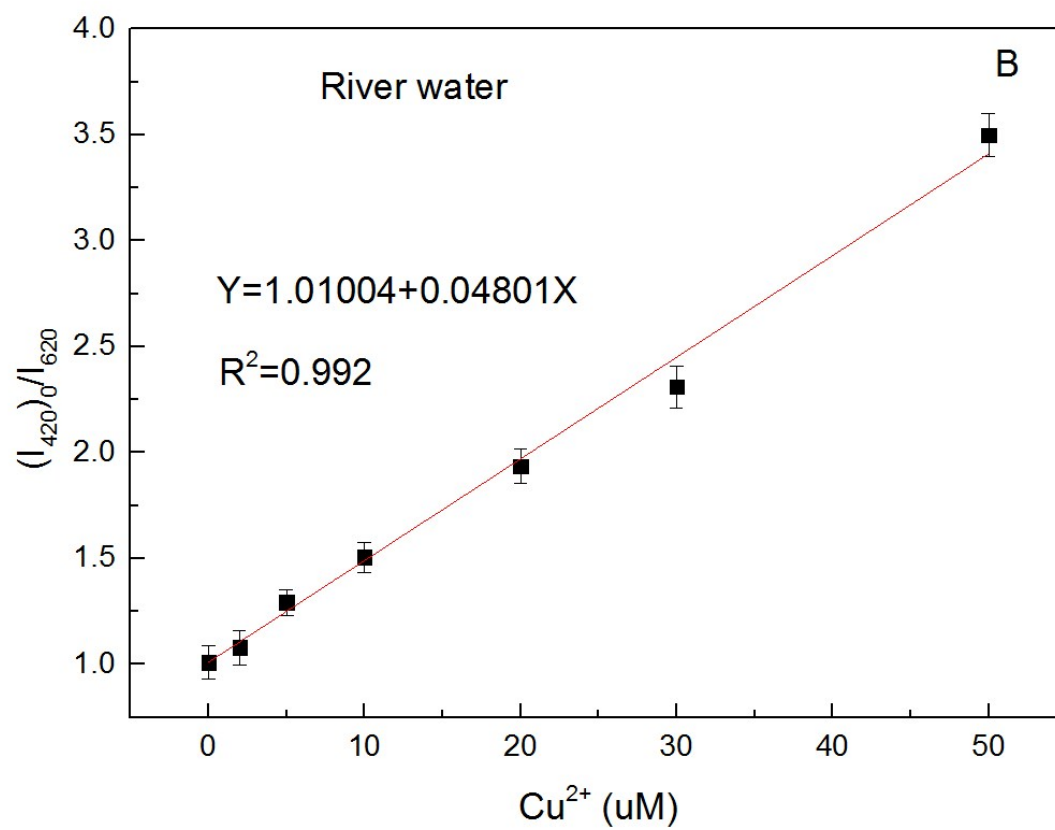



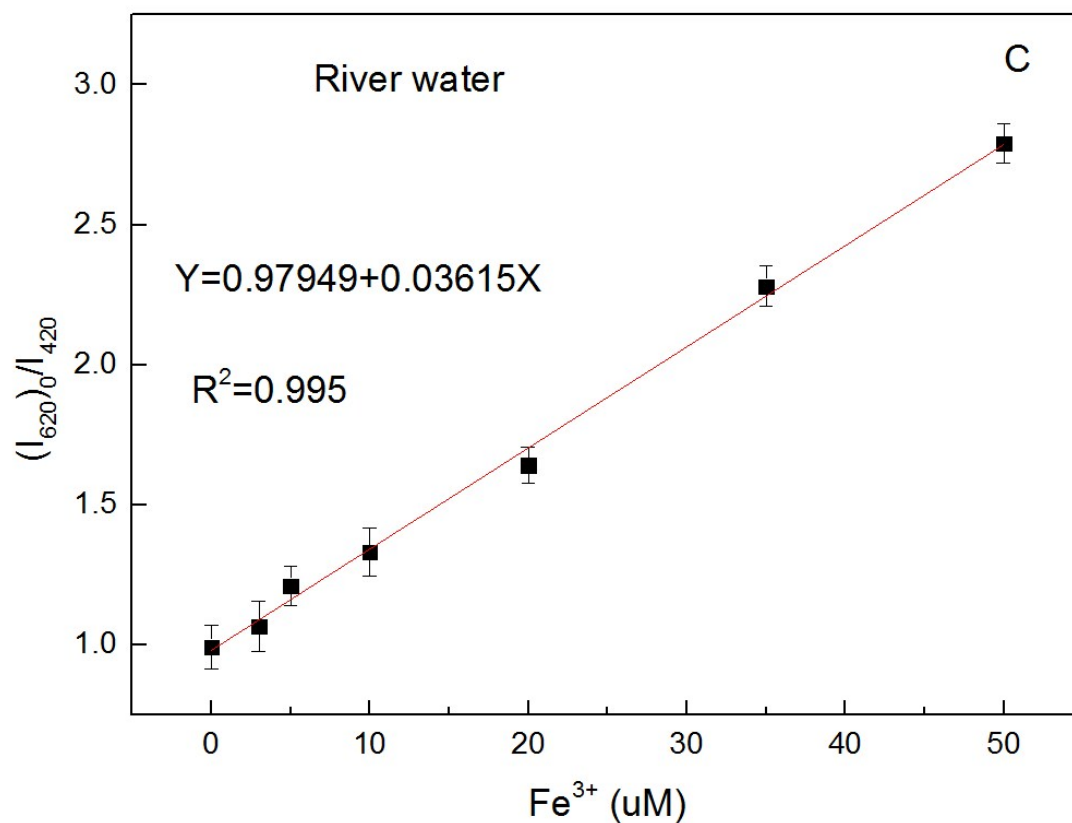

**Figure S4** The fluorescence spectra of IIFPs exposure to different concentrations of Cu<sup>2+</sup> and Fe<sup>3+</sup> in river water samples (A). B and C were the linear fitting curve of Cu<sup>2+</sup> and Fe<sup>3+</sup> detection in river water sample. The experimental conditions: excited wavelength at 345 nm and the slit widths of emission and excitation were 5 nm (n = 3); reaction time was 20 min, the concentration of IIFPs was 100 mg/L.

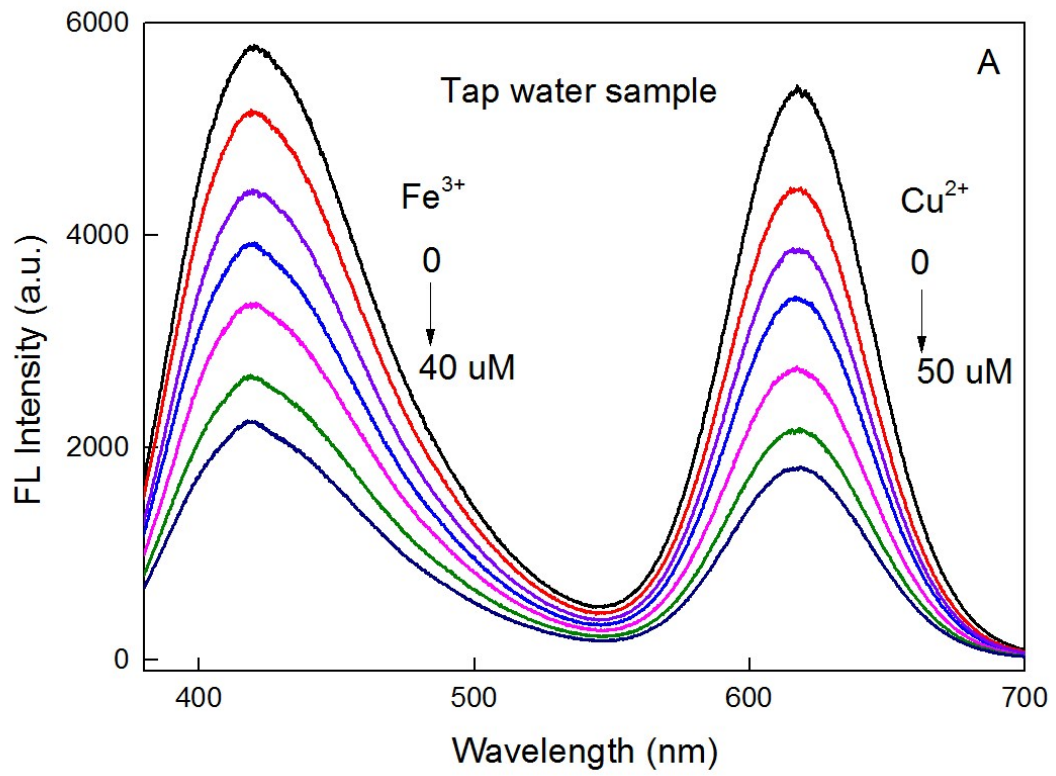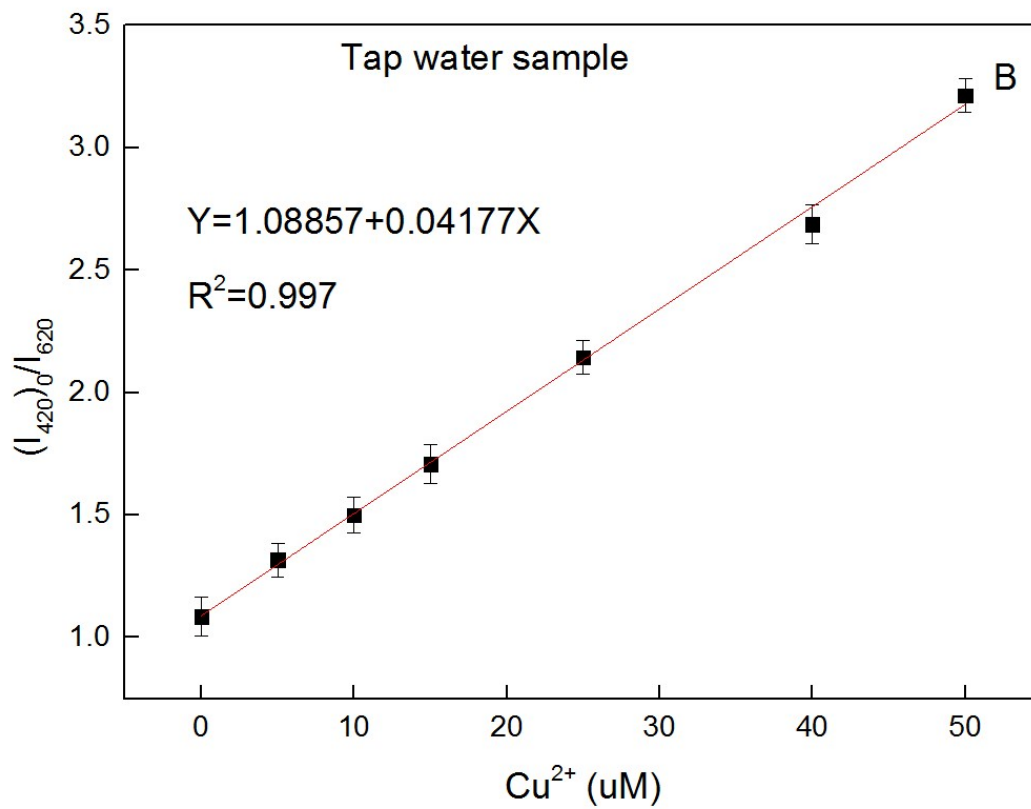

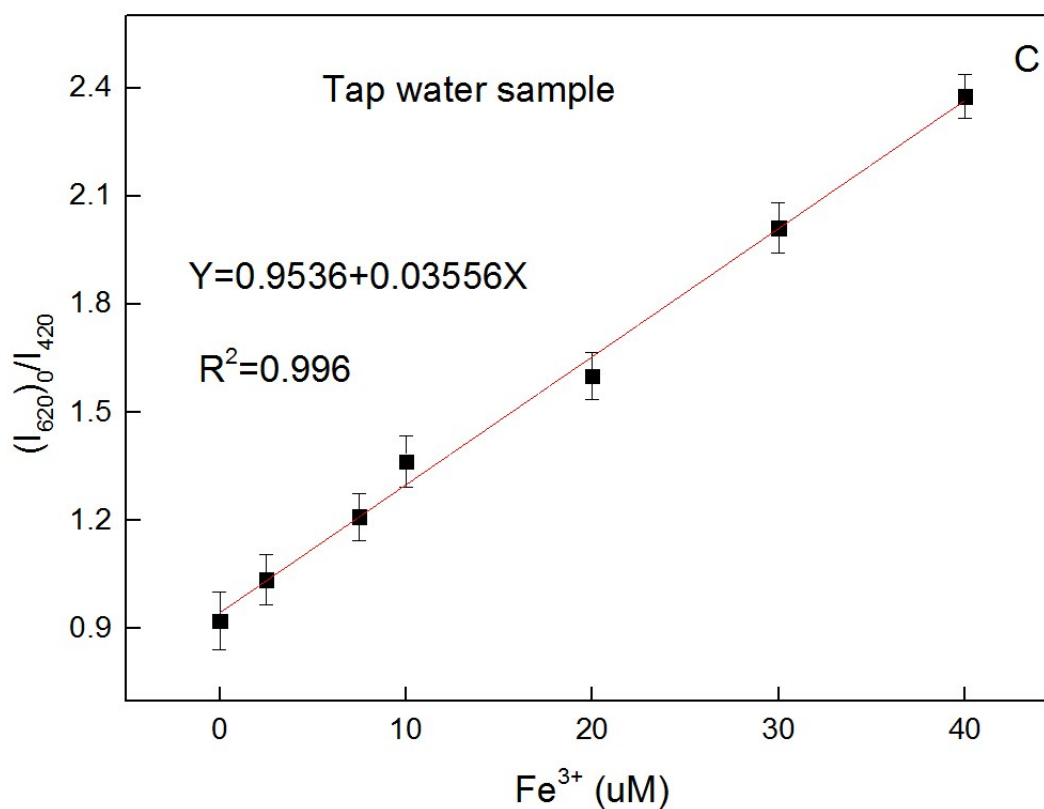

**Figure S5** The fluorescence spectrum of IIPs exposure to different concentrations of  $Cu^{2+}$  and  $Fe^{3+}$  in tap water samples (A). B and C were the linear fitting curve of  $Cu^{2+}$  and  $Fe^{3+}$  detection in tap water sample. The experimental conditions: excited wavelength at 345 nm and the slit widths of emission and excitation were 5 nm ( $n = 3$ ); reaction time was 20 min, the concentration of IIPs was 100 mg/L.

**Table S1** The linear range and LOD for Cu<sup>2+</sup> and Fe<sup>3+</sup> measured by different concentration of imprinted probes.

| Concentration of probe (mg/L) | Cu <sup>2+</sup> detection |      | Fe <sup>3+</sup> detection |      |
|-------------------------------|----------------------------|------|----------------------------|------|
|                               | Linear range               | LOD  | Linear range               | LOD  |
|                               | ( $\mu$ M)                 | (nM) | ( $\mu$ M)                 | (nM) |
| 50                            | 0.5-30                     | 156  | 1-50                       | 322  |
| 100                           | 0.5-50                     | 130  | 1-100                      | 340  |
| 150                           | 2-100                      | 526  | 4-150                      | 1470 |

**Table S2** Detected concentration of Cu<sup>2+</sup> and Fe<sup>3+</sup> in river and tap water by this method and AAS.

| sample      | Cu <sup>2+</sup> ( $\mu$ M) |      | Fe <sup>3+</sup> ( $\mu$ M) |      |
|-------------|-----------------------------|------|-----------------------------|------|
|             | This method                 | AAS  | This method                 | AAS  |
| River water | 5.34                        | 5.41 | 2.78                        | 2.68 |
| Tap water   | 4.35                        | 4.42 | 3.12                        | 3.04 |

**Table S3 Recoveries of Cu<sup>2+</sup> and Fe<sup>3+</sup> in spiked river and tap water**

| Type           | Sample      | ions                    | Added ( $\mu\text{M}$ ) | Found ( $\mu\text{M}$ ) | Recovery (%) | RSD (%) |
|----------------|-------------|-------------------------|-------------------------|-------------------------|--------------|---------|
| Single spiking | River water | Cu <sup>2+</sup> (5.34) | 0.50                    | 6.07                    | 104.0        | 3.6     |
|                |             |                         | 5.00                    | 10.17                   | 98.4         | 3.4     |
|                |             |                         | 20.00                   | 25.16                   | 99.3         | 2.4     |
|                |             | Fe <sup>3+</sup> (2.78) | 1.00                    | 3.63                    | 96.0         | 3.9     |
|                |             |                         | 5.00                    | 7.44                    | 95.6         | 2.9     |
|                |             |                         | 20.00                   | 22.89                   | 100.5        | 2.4     |
|                | Tap water   | Cu <sup>2+</sup> (4.35) | 0.50                    | 4.95                    | 102.0        | 4.2     |
|                |             |                         | 5.00                    | 9.09                    | 97.2         | 3.4     |
|                |             |                         | 20.00                   | 23.45                   | 96.3         | 2.9     |
|                |             | Fe <sup>3+</sup> (3.12) | 1.00                    | 4.06                    | 98.6         | 3.9     |
|                |             |                         | 5.00                    | 7.75                    | 95.4         | 3.1     |
|                |             |                         | 20.00                   | 22.82                   | 98.7         | 2.6     |
| Mixed spiking  | River water | Cu <sup>2+</sup> (5.34) | 20.00                   | 25.16                   | 99.3         | 2.5     |
|                |             | Fe <sup>3+</sup> (2.78) | 5.00                    | 7.50                    | 96.4         | 3.7     |
|                | Tap water   | Cu <sup>2+</sup> (4.35) | 20.00                   | 19.76                   | 98.8         | 2.9     |
|                |             | Fe <sup>3+</sup> (3.12) | 5.00                    | 8.93                    | 110.8        | 3.7     |

**Table S4** Performance comparison with other reported fluorescence methods or IIP based detection method for Cu<sup>2+</sup> or Fe<sup>3+</sup> ions sensing

| Detected method                                           | Linear rang<br>( $\mu\text{M}$ ) | LOD<br>(nM) | Real sample            | Ref.      |
|-----------------------------------------------------------|----------------------------------|-------------|------------------------|-----------|
| Cu-IIP -FAAS                                              | 0.0157-1.57                      | 1.6         | Tap and well water     | 1         |
| Cu-IIP-ICP-AES                                            | 0-15.7                           | 5.9         | drinking water         | 2         |
| Dual emission CDs based ratiometric<br>fluorescence probe | 0-0.5                            | 7.31        | Tap water lake water   | 3         |
| Dual emission QDs based ratiometric<br>fluorescence probe | 0.05-0.5                         | 1.1         | Lake water             | 4         |
| Cu-IIFP                                                   | 0–70.0.                          | 110-140     | Tap water, river water | 5         |
| Cu-IIFP chip                                              | $1.7 \times 10^{-3}$ -0.913      | 0.551       | Lake water; sea water  | 6         |
| Cu-IIFP                                                   | 0.5-50                           | 130         | River water, tap water | This work |

|                                                   |         |     |                        |           |
|---------------------------------------------------|---------|-----|------------------------|-----------|
| Fe-IIFP                                           | 1.0-100 | 340 | River water, tap water | This work |
| CDs for Fe <sup>3+</sup> detection                | 1--150  | 330 | River water            | 7         |
| nitrogen-doped CDs for Fe <sup>3+</sup> detection | 2–25 μM | 170 | Drinking water         | 8         |

#### Reference

- [1] M. Shamsipur, A. Besharati-Seidani, J. Fasihi and H. Sharghi, *Talanta*, 2010, 83, 674-681.
- [2]. Hossein Hashemi, Mostafa Khajeh, Massoud Kaykhahi, *Anal. Methods*, 2013, 5, 2778-2783.
- [3] Y. Wang, M. Wu, S. Yu and C. Jiang, *RSC Adv.*, 2018, 8, 12708–12713.
- [4] J. Yao, K. Zhang, H. Zhu, F. Ma, M. Sun, H. Yu, J. Sun and S. Wang, *Anal. Chem.* 2013, 85, 6461–6468.
- [5] Z. Xu, P. Deng, J. Li, S. Tang, *Sensors and Actuators B* 255 (2018) 2095–2104.
- [6] J. Qi, B. Li, X. Wang, Z. Zhang, Z. Wang, J. Han, L. Chen, *Sensors and Actuators B* 251 (2017) 224–233
- [7] J. Shangguan, J. Huang, D. He, X. He, K. Wang, R. Ye, X. Yang, T. Qing and J. Tang, *Anal. Chem.* 2017, 89, 7477–7484.
- [8] X. Miao, X. Yan, D. Qu, D. Li, F. Feng Tao and Z. Sun, *ACS Appl. Mater. Interfaces* 2017, 9, 18549–18556.
